# Supplementary figures and images for: TSLP and IL‐33 reciprocally promote each other's lung protein expression and ILC2 receptor expression to enhance innate type‐2 airway inflammation
Source: PubMed Central journal article supplement — Allergy. 2020 Feb 24;75(7):1606–17. doi: 10.1111/all.14196 (PMC7354889; doi:10.1111/all.14196), 2020-02-24

FIGURE S6

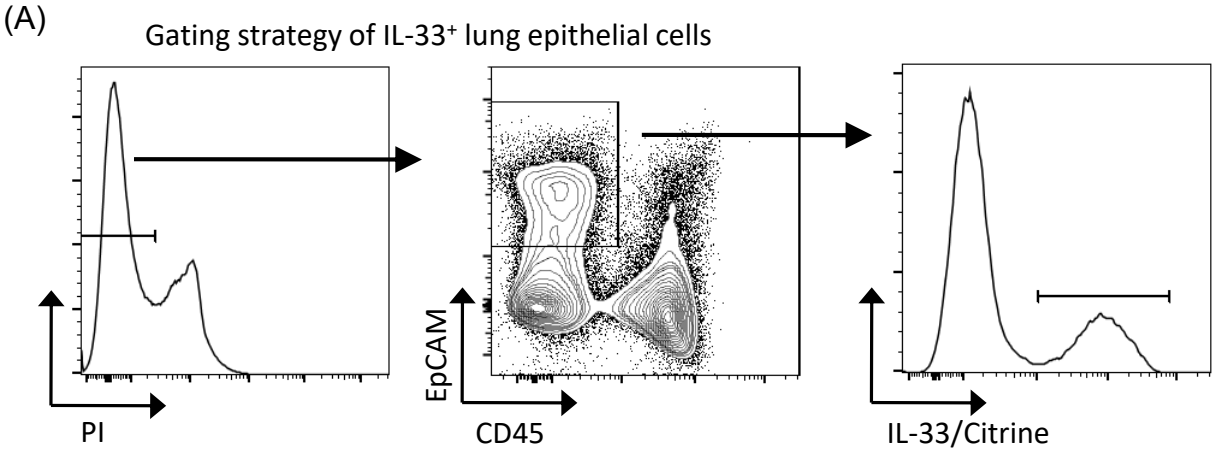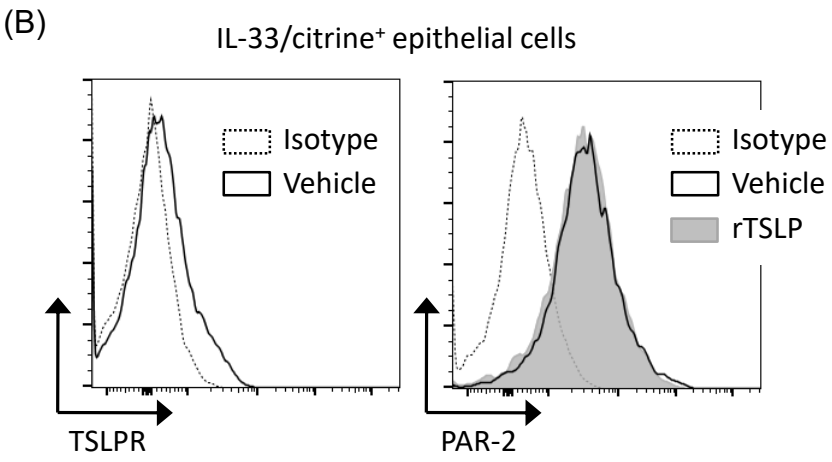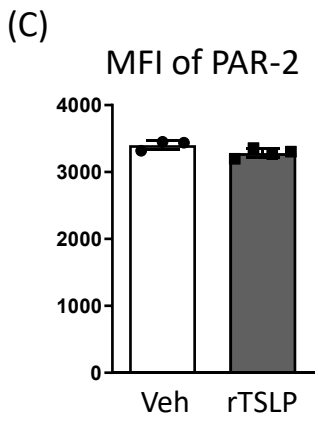

Supplement: NIHMS1552197-supplement-Supp_FigureS6.pdf [file NIHMS1552197-supplement-Supp_FigureS6.pdf]
